# Supplementary material for: Tough and degradable photopolymers derived from alkyne monomers for 3D printing of biomedical materials
Source: Royal Society of Chemistry journal article supplement (doi:10.1039/c6py01132b), 2016-01-01
Supplement: c6py01132b1.pdf [file c6py01132b1.pdf]

## Electronic Supplementary Information (ESI):

### Tough and Degradable Photopolymers Derived from Alkyne Monomers for 3D Printing of Biomedical Materials

Andreas Oesterreicher<sup>1</sup>, Johannes Wiener<sup>1</sup>, Meinhart Roth<sup>1</sup>, Andreas Moser<sup>2</sup>, Robert Gmeiner<sup>3</sup>, Matthias Edler<sup>1</sup>, Gerald Pinter<sup>2</sup>, Thomas Griesser<sup>1\*</sup>

<sup>1</sup>Chair of Chemistry of Polymeric Materials & Christian Doppler Laboratory for Functional and Polymer Based Ink-Jet Inks, University of Leoben, Otto-Glöckel-Strasse 2, A-8700 Leoben, Austria

<sup>2</sup>Chair of Material Science and Testing of Polymers, University of Leoben, Otto-Glöckel-Strasse 2, A-8700 Leoben, Austria

<sup>3</sup>Cubicure GmbH, Photopolymer development, Getreidemarkt 9, 1060 Vienna, Austria

\*corresponding author: Thomas Griesser, email: thomas.griesser@unileoben.ac.at, Tel. +43-3842-402-2358;

#### Real-time FT-IR spectroscopy

Figure S1 shows the triple bond conversion of alkyne carbonate/TMPMP formulations (C-H stretch observed at 3288 cm<sup>-1</sup>) and the double bond conversion of 4MAC and 4AC (C=C stretch at 1640 cm<sup>-1</sup>) during UV illumination. The monomer conversions (MC) as depicted in Table 1 were determined after 2 min of illumination.

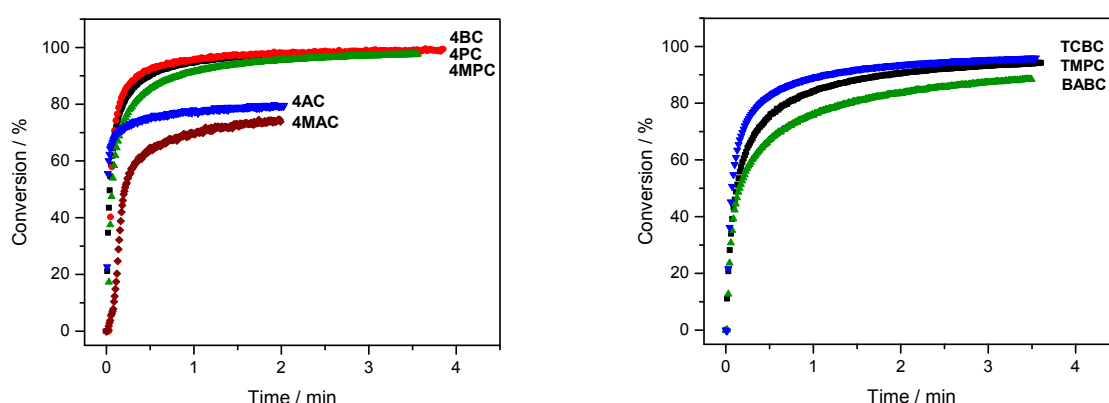

Figure S1: Triple (alkyne carbonates) and double bond ((meth)acrylates) conversion versus illumination time.

## Cytotoxicity (ISO 10993-5:2009)

Detailed results [Cell protein content versus monomer concentration, including negative (medium) and positive control (Triton 1%)] obtained by cytotoxicity tests are listed in Figure S2.

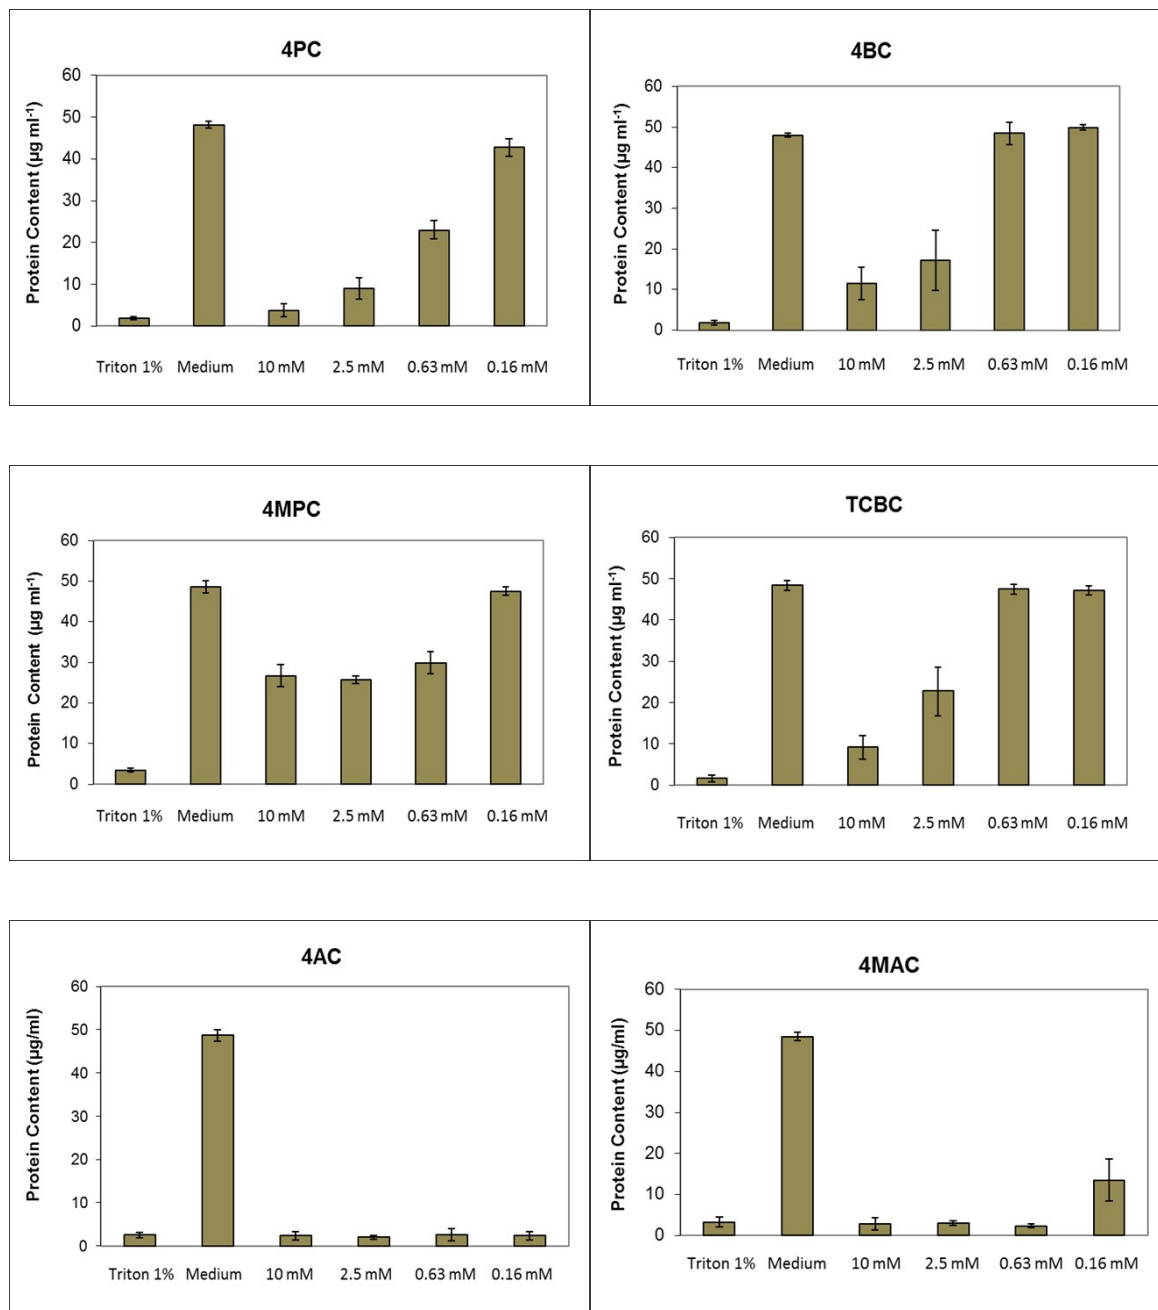

Figure S2: Results obtained from cytotoxicity tests showing the cell protein content versus the monomer concentration of investigated alkyne carbonates and reference substances 4AC and 4MAC.

## DMA

Figure S3 shows the DMA plot of 4MAC.

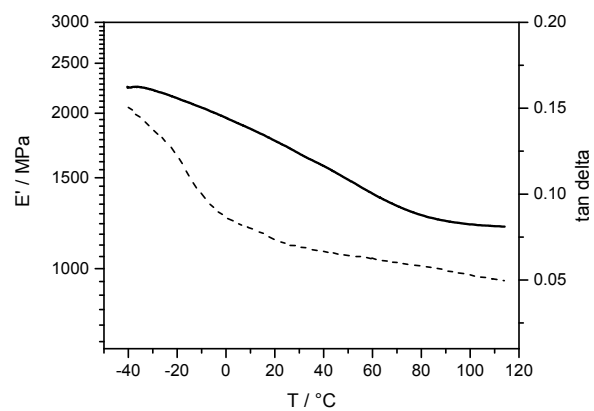

**Figure S3: DMA plot of 4MAC showing  $E'$  (solid) and  $\tan \delta$  (dashed).**
